# Supplementary material for: Genetic Association of ERAP1 and ERAP2 With Eclampsia and Preeclampsia in Northeastern Brazilian Women
Source: Research Square preprint supplement (doi:10.21203/rs.3.rs-235628/v1), 2021-02-25
Supplement: Supplementary file 1 [file 6a0a6138fb03dc86181ba6b8.pdf]

## **Supplementary Information**

1

2 **Title: Genetic association of *ERAP1* and *ERAP2* with eclampsia and**  
3 **preeclampsia in northeastern Brazilian women**

4 **LEONARDO CAPISTRANO FERREIRA \*** (ferreiralc@cb.ufrn.br)  
5 Department of Biochemistry, Federal University of Rio Grande do Norte, Natal, Brazil;  
6 Institute of Tropical Medicine of Rio Grande do Norte, Federal University of Rio Grande do  
7 Norte, Natal, Brazil.

8  
9 **CARLOS EDUARDO MAIA GOMES** (c\_maia@yahoo.com)  
10 Department of Biophysics and Pharmacology, Federal University of Rio Grande do Norte,  
11 Natal, Brazil.

12  
13 **PRIYA DUGGAL** (pduggal@jhu.edu)  
14 Bloomberg School of Public Health, Johns Hopkins University, Baltimore, USA.

15  
16 **INGRID DE PAULA HOLANDA**  
17 Department of Biochemistry, Federal University of Rio Grande do Norte, Natal, Brazil.

18  
19 **AMANDA SAMARA DE LIMA**  
20 Maternidade Escola Januario Cicco, Federal University of Rio Grande do Norte.

21  
22 **PAULO RICARDO PORFÍRIO DO NASCIMENTO**  
23 Institute of Tropical Medicine of Rio Grande do Norte, Federal University of Rio Grande do  
24 Norte, Natal, Brazil.

25  
26 **SELMA MARIA BEZERRA JERONIMO** (smbj@cb.ufrn.br)  
27 Department of Biochemistry, Federal University of Rio Grande do Norte, Natal, Brazil;  
28 Institute of Tropical Medicine of Rio Grande do Norte, Federal University of Rio Grande do  
29 Norte, Natal, Brazil; Institute of Science and Technology of Tropical Diseases (INCT-DT),  
30 Brazil.

31  
32  
33 **\* Corresponding author:**  
34 Leonardo Capistrano Ferreira  
35 Department of Biochemistry, Center of Biosciences, Federal University of Rio Grande do  
36 Norte. Av. Sen. Salgado Filho, S/N, Campus Universitário - Lagoa Nova - Natal, RN, 59078-  
37 900, Brazil.  
38 E-mail: [ferreiralc@cb.ufrn.br](mailto:ferreiralc@cb.ufrn.br)  
39

## Supplementary Information

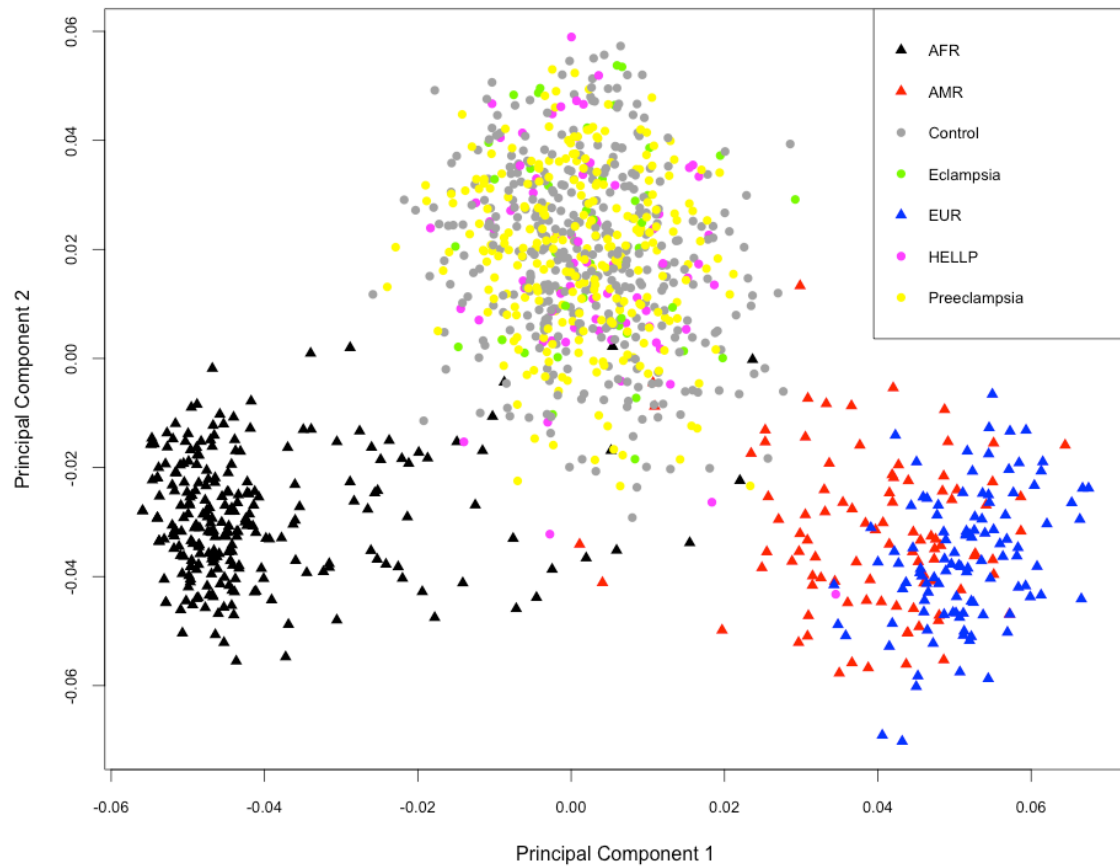

**Supplementary Figure 1.** Scatter plot of the two principal components estimated from genotype information of 27 Ancestry Informative Markers (AIMs). Our study samples (n=756) belong to the highly admixed Brazilian population that clustered together in an intermediate region relative to the African (AFR), European (EUR) and Amerindian (AMR) reference populations from The 1000 Genomes Project. Importantly, control and cases women were equally distributed suggesting absence of population stratification.

### Supplementary Information

**Supplementary Table 1.** Allele frequency comparisons across phenotypic groups.

| Gene         | SNP        | Minor allele | Minor allele frequency |       |         |           |       |
|--------------|------------|--------------|------------------------|-------|---------|-----------|-------|
|              |            |              | Control                | PE    | PEsuper | Eclampsia | HELLP |
| <i>LNPEP</i> | rs27300    | C            | 0.402                  | 0.382 | 0.375   | 0.370     | 0.414 |
|              | rs38034    | T            | 0.396                  | 0.371 | 0.375   | 0.340     | 0.389 |
|              | rs2303138  | A            | 0.122                  | 0.130 | 0.105   | 0.132     | 0.128 |
| <i>ERAP1</i> | rs30187    | T            | 0.459                  | 0.458 | 0.459   | 0.391     | 0.400 |
|              | rs27044    | G            | 0.354                  | 0.358 | 0.328   | 0.340     | 0.327 |
| <i>ERAP2</i> | rs2549796  | C            | 0.485                  | 0.506 | 0.467   | 0.406     | 0.509 |
|              | rs2927609  | T            | 0.380                  | 0.364 | 0.356   | 0.326     | 0.385 |
|              | rs11135484 | A            | 0.447                  | 0.443 | 0.440   | 0.425     | 0.467 |

No difference was detected ( $p>0.05$ ) when each case group was compared against control group.
